# Supplementary material for: Mesoporous Bi2S3 nanorods with graphene-assistance as low-cost counter-electrode materials in dye-sensitized solar cells
Source: Royal Society of Chemistry journal article supplement (doi:10.1039/c4nr04274c), 2014-01-01
Supplement: c4nr04274c1.pdf [file c4nr04274c1.pdf]

## Supporting Information

### **Mesoporous Bi<sub>2</sub>S<sub>3</sub> Nanorods with Graphene-Assistance as Low-Cost Counter-Electrode Materials in Dye-Sensitized Solar Cells**

Sheng-qi Guo,<sup>a</sup> Tian-zeng Jing,<sup>a</sup> Xiao Zhang,<sup>a</sup> Xiao-bing Yang,<sup>c</sup> Zhi-hao Yuan<sup>\*b</sup> and Fang-zhong Hu<sup>\*c</sup>

<sup>a</sup> Tianjin Key Laboratory of Environmental Remediation and Pollution Control, Nankai University, Tianjin 300071, China.

<sup>b</sup> Tianjin Key Lab for Photoelectric Materials & Devices, Tianjin 300384, China. E-mail: [zhyuan@tjut.edu.cn](mailto:zhyuan@tjut.edu.cn)

<sup>c</sup> State Key Laboratory and Institute of Elemento-Organic Chemistry, Nankai University, Tianjin 300071, China. E-mail: [fzhu@nankai.edu.cn](mailto:fzhu@nankai.edu.cn)

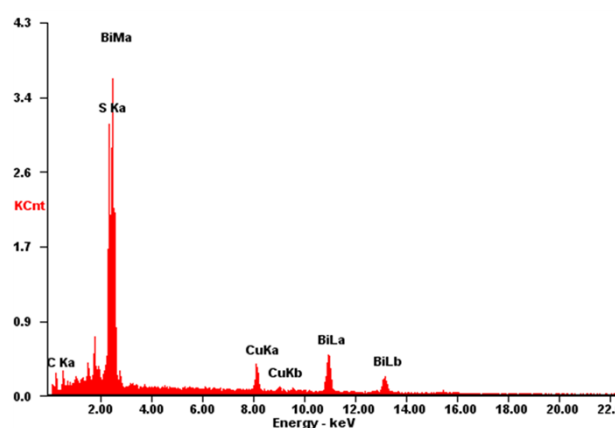

**Figure S1.** EDS image of the Bi<sub>2</sub>S<sub>3</sub> sample.

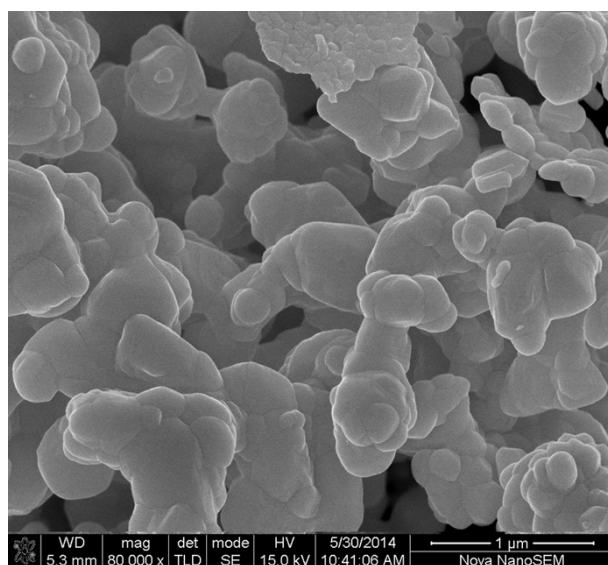

**Figure S2.** SEM image of the  $\text{Bi}_2\text{S}_3$  sample as counter electrodes after calcined at  $450^\circ\text{C}$ .

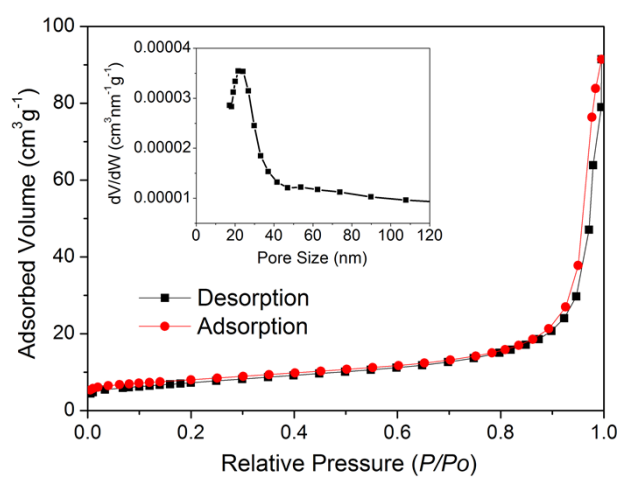

**Figure S3.**  $\text{N}_2$  adsorption/desorption isotherm and Barrett-Joyner-Halenda (BJH) pore size distribution plot (inset) of  $\text{Bi}_2\text{S}_3$  nanorods after calcined at  $450^\circ\text{C}$ .

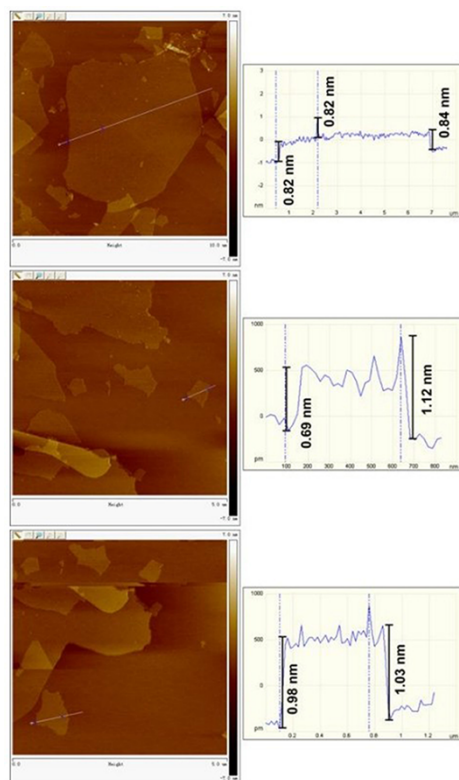

**Figure S4.** AFM images of added rGO powder.

The atomic force microscopy (AFM) images indicate the height of the rGO to be 0.35–1 nm, which reveals that the graphene sheets are either mono- or bi-layered.

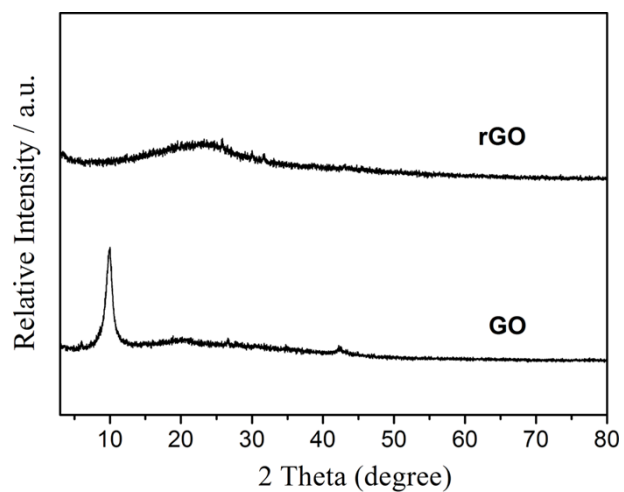

**Figure S5.** XRD patterns of the GO and rGO.
